# Supplementary material
Source: PubMed Central journal article supplement (PMC4787515)
Supplement: rair686840.wt1_default.pdf [file rair686840.wt1_default.pdf]

**Table A** Distribution of emergency admission by social factors and admission period for colorectal cancer patients (1 April 1999-31 March 2006) [posted as supplied by author]

| Variable                   | Number of emergency admissions (% of total admissions) |                          |                          |                          |                          |                          |                          | Total emergency admissions | Total admissions * |
|----------------------------|--------------------------------------------------------|--------------------------|--------------------------|--------------------------|--------------------------|--------------------------|--------------------------|----------------------------|--------------------|
|                            | 1 Apr 1999 – 31 Mar 2000                               | 1 Apr 2000 – 31 Mar 2001 | 1 Apr 2001 – 31 Mar 2002 | 1 Apr 2002 – 31 Mar 2003 | 1 Apr 2003 – 31 Mar 2004 | 1 Apr 2004 – 31 Mar 2005 | 1 Apr 2005 – 31 Mar 2006 |                            |                    |
| Gender                     |                                                        |                          |                          |                          |                          |                          |                          |                            |                    |
| Men                        | 4943 (31.4%)                                           | 4485 (30.0%)             | 4309 (30.4%)             | 4266 (30.1%)             | 4378 (30.3%)             | 4411 (30.8%)             | 4141 (27.7%)             | 30 933 (30.1%)             | 102 772            |
| Women                      | 4756 (36.3%)                                           | 4357 (35.5%)             | 4159 (35.5%)             | 4116 (35.2%)             | 4087 (35.1%)             | 4264 (36.2%)             | 4012 (33.5%)             | 29 751 (35.3%)             | 84 205             |
| IMD Fifth                  |                                                        |                          |                          |                          |                          |                          |                          |                            |                    |
| IMD Q1 (Most Deprived)     | 2244 (39.7%)                                           | 1909 (36.7%)             | 1866 (38.2%)             | 1817 (38.0%)             | 1767 (37.8%)             | 1769 (38.8%)             | 1654 (35.7%)             | 13 026 (37.9%)             | 34 404             |
| IMD Q2                     | 1976 (34.4%)                                           | 1827 (34.0%)             | 1726 (34.3%)             | 1783 (35.2%)             | 1747 (34.6%)             | 1812 (35.3%)             | 1651 (32.6%)             | 12 522 (34.3%)             | 36 470             |
| IMD Q3                     | 1997 (32.6%)                                           | 1827 (32.4%)             | 1785 (32.6%)             | 1713 (31.8%)             | 1726 (31.5%)             | 1837 (33.4%)             | 1701 (29.9%)             | 12 586 (32.0%)             | 39 309             |
| IMD Q4                     | 1849 (31.0%)                                           | 1741 (30.5%)             | 1663 (30.0%)             | 1612 (29.0%)             | 1673 (30.1%)             | 1739 (31.1%)             | 1584 (27.2%)             | 11 861 (29.8%)             | 39 753             |
| IMD Q5 (Least Deprived)    | 1633 (30.4%)                                           | 1538 (29.1%)             | 1428 (28.9%)             | 1457 (28.7%)             | 1552 (29.3%)             | 1518 (28.5%)             | 1563 (27.3%)             | 10 689 (28.9%)             | 37 041             |
| Age Group                  |                                                        |                          |                          |                          |                          |                          |                          |                            |                    |
| 50-59                      | 926 (24.3%)                                            | 894 (24.4%)              | 883 (25.3%)              | 827 (23.7%)              | 844 (24.5%)              | 831 (24.4%)              | 897 (24.3%)              | 6102 (24.4%)               | 25 002             |
| 60-69                      | 1976 (26.0%)                                           | 1717 (25.0%)             | 1608 (24.8%)             | 1620 (25.2%)             | 1672 (25.6%)             | 1696 (26.3%)             | 1602 (23.7%)             | 11 891 (25.2%)             | 47 149             |
| 70-79                      | 3495 (32.4%)                                           | 3091 (30.6%)             | 2909 (31.2%)             | 2814 (30.6%)             | 2790 (29.8%)             | 2889 (31.0%)             | 2599 (27.3%)             | 20 587 (30.4%)             | 67 625             |
| 80-89                      | 2763 (47.0%)                                           | 2582 (45.2%)             | 2527 (43.9%)             | 2605 (43.8%)             | 2587 (43.9%)             | 2660 (44.1%)             | 2511 (41.3%)             | 18 235 (44.2%)             | 41 299             |
| 90+                        | 539 (68.3%)                                            | 558 (65.3%)              | 541 (65.1%)              | 516 (63.9%)              | 572 (67.2%)              | 599 (66.1%)              | 544 (63.0%)              | 3869 (65.6%)               | 5902               |
| Total emergency admissions | 9699 (33.6%)                                           | 8842 (32.5%)             | 8468 (32.7%)             | 8382 (32.4%)             | 8465 (32.5%)             | 8675 (33.2%)             | 8153 (30.3%)             | 60 684 (32.5%)             |                    |
| Total admissions*          | 28 859                                                 | 27 223                   | 25 892                   | 25 862                   | 26 086                   | 26 123                   | 26 932                   |                            | 186 977            |
